# Supplementary material for: Interests and needs of eye care providers in clinical decision support for glaucoma
Source: HighWire-hosted journal article supplement (doi:10.1136/bmjophth-2020-000639), 2021-01-01

## Online Supplemental Material

### Email text:

We are conducting a research survey to gauge interest in clinical decision support tools for glaucoma.

Clinical decision support tools are computer programs designed to assist clinicians as they make decisions for patient care. These tools can be integrated into Electronic Medical Records and can provide information to help with clinical decision making.

An example is an electronic health record add-on app that was developed to help with neonatal bilirubin management. For neonatal bilirubin management without the add-on app, clinicians must retrieve data that is scattered across the medical record, synthesize the data, and apply guideline algorithms to develop patient-specific treatment plans. The clinical decision support tool gathers the data into one display and provides guideline-based treatment recommendations. (See attached image for an example display.)

**Please follow this link to complete the survey:** <http://i.mp/2VSZpVF>

The survey should take **2-3 minutes to complete** and will be completely anonymous.

Your participation is completely voluntary. You may choose not to answer a question or are free to discontinue participation in the survey at any time for any reason without penalty or loss of benefits. There are no known risks associated with participating in this survey. You may experience a benefit in the form of increased insight and awareness into your clinical practices and support needs.

By participating in the survey, you are giving your consent to participate in this research. Thank you for your willingness to participate!

Confidential

Page 1

# Survey about Clinical Decision Support for Glaucoma

Please complete the survey below. Your responses will be anonymous.

Thank you!

1) Would you be interested in using a clinical decision support tool for glaucoma?

Definitely  Probably  Probably not  Definitely not

## Do you think the following characteristics of clinical decision support tools would be important for you in clinical practice?

|                                                                                             | Very important        | Moderately important  | Slightly important    | Unimportant           |
|---------------------------------------------------------------------------------------------|-----------------------|-----------------------|-----------------------|-----------------------|
| 2) The tool is integrated into my clinic workflow                                           | <input type="radio"/> | <input type="radio"/> | <input type="radio"/> | <input type="radio"/> |
| 3) The tool integrates with my current Electronic Medical Record                            | <input type="radio"/> | <input type="radio"/> | <input type="radio"/> | <input type="radio"/> |
| 4) I don't have to remember to use it, the results are just provided to me                  | <input type="radio"/> | <input type="radio"/> | <input type="radio"/> | <input type="radio"/> |
| 5) I don't have to enter any data manually, the data is entered into the tool automatically | <input type="radio"/> | <input type="radio"/> | <input type="radio"/> | <input type="radio"/> |
| 6) The tool interface is easy to use                                                        | <input type="radio"/> | <input type="radio"/> | <input type="radio"/> | <input type="radio"/> |
| 7) Using the tool requires minimal time                                                     | <input type="radio"/> | <input type="radio"/> | <input type="radio"/> | <input type="radio"/> |

## Do you think each of the following patient care decisions would benefit from a clinical decision support tool that fulfills the important characteristics listed above?

|                                                                                           | Definitely            | Probably              | Probably not          | Definitely not        |
|-------------------------------------------------------------------------------------------|-----------------------|-----------------------|-----------------------|-----------------------|
| 8) Increasing certainty when first diagnosing a patient with glaucoma                     | <input type="radio"/> | <input type="radio"/> | <input type="radio"/> | <input type="radio"/> |
| 9) Determining the optimal time for the next follow-up testing for patients with glaucoma | <input type="radio"/> | <input type="radio"/> | <input type="radio"/> | <input type="radio"/> |
| 10) Increasing certainty when identifying progression of glaucoma                         | <input type="radio"/> | <input type="radio"/> | <input type="radio"/> | <input type="radio"/> |
| 11) Increasing certainty when deciding whether or not to intensify glaucoma treatment     | <input type="radio"/> | <input type="radio"/> | <input type="radio"/> | <input type="radio"/> |

12)

Confidential

Page 2

Increasing certainty when choosing the next treatment step (additional medication, laser, etc.)

13) What is your age?

20-29  30-39  40-49  50-59  60+

14) How do you identify yourself?

Female  Male  Other

15) How do you identify yourself? [choose all that apply]

American Indian  Asian  Black  Hispanic  Other  White

16) How many years have you been in practice?

0-5  6-10  11-15  16-20  21+

17) Which best describes your practice setting?

Private practice - Small Group (/= 4 providers)  
 Multi-specialty clinic / Health System  
 Academic  
 Other

18) What is your specialty?

Optometrist  
 Ophthalmologist: glaucoma specialist  
 Ophthalmologist: non-glaucoma specialist

19) How many patients do you see in a typical clinic day?

0-20  21-40  41-60  60+

20) What percent of the patients you see have glaucoma?

0%-25%  26%-50%  51%-75%  76%-100%

21) Are any of the following routinely involved in your clinic? [choose all that apply]

Scribes  Students  Residents  Fellows  None

**A** Patient with hyperbilirubinemia

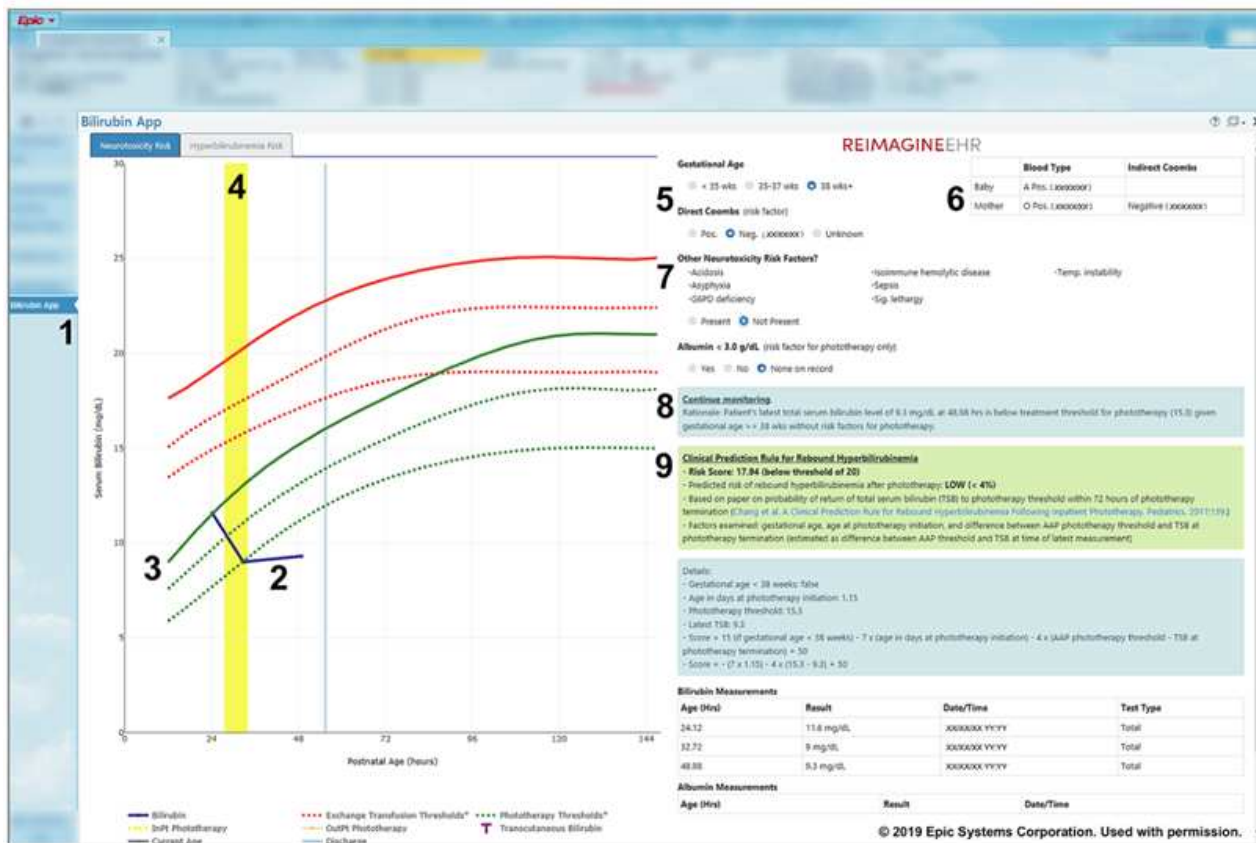

**B** Patient with projected hyperbilirubinemia

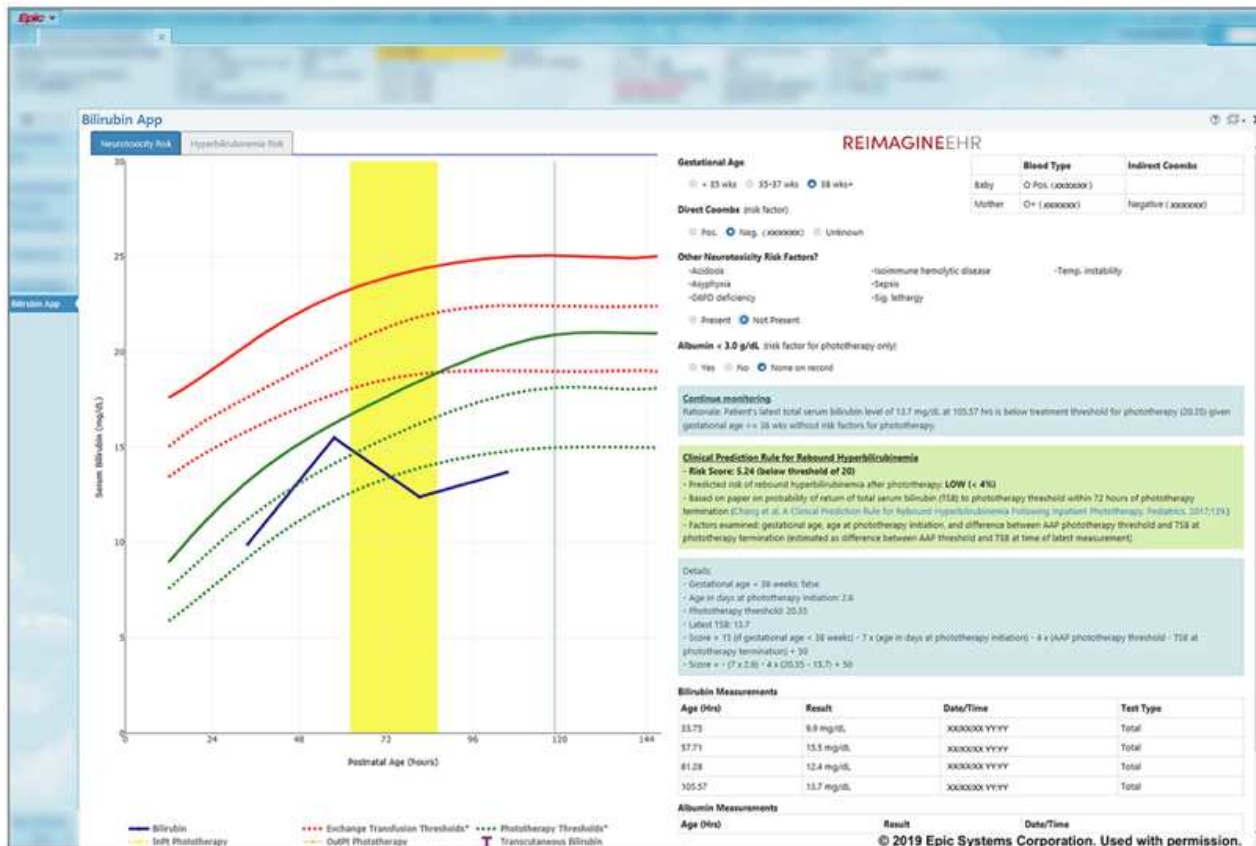

Supplement: bmjophth-2020-000639supp001_data_supplement.pdf [file bmjophth-2020-000639supp001_data_supplement.pdf]
